# Supplementary material
Source: Research Square preprint supplement (doi:10.21203/rs.3.rs-8993112/v1)
Supplement: Supplementary file 1 [file 473082af154925e5e8b46026.docx]

**Table 1: Sociodemographic Details of In-depth Interview Participants**

| **Participant ID** | **Age** | **Number of Children** | **Educational Qualification** | **Income Level** | **Employment Status** |
| --- | --- | --- | --- | --- | --- |
| P1 | 44 | 2 | Primary | EWS* | Homemaker |
| P2 | 40 | 2 | Primary | EWS | Homemaker |
| P3 | 28 | 1 | Postgraduate | EWS | Student |
| P4 | 33 | 2 | Undergraduate | EWS | Employed |
| P5 | 30 | 1 | Undergraduate | EWS | Homemaker |
| P6 | 38 | 1 | Postgraduate | EWS | Homemaker |
| P7 | 27 | 1 | Undergraduate | EWS | Employed |
| P8 | 49 | 2 | Secondary | EWS | Homemaker |
| P9 | 28 | 1 | Undergraduate | LIG* | Employed |
| P10 | 39 | 2 | Secondary | EWS | Homemaker |
| P11 | 38 | 1 | Secondary | EWS | Employed |
| P12 | 23 | 1 | Undergraduate | EWS | Homemaker |

**Note :**

- EWS – Economically Weaker Section
- LIG – Lower Income Group

**Table 2 : Sociodemographic Details of Focus Group Discussion**

| **Participant ID** | **Age** | **Sex** | **Years of Experience** | **Occupation** |
| --- | --- | --- | --- | --- |
| C1 | 26 | Female | 5 | Counsellor |
| C2 | 24 | Female | 3 | Counsellor |
| GS | 25 | Female | 3 | Grassroots Social worker |
| OS | 27 | Male | 5 | Outreach Specialist |
| EX | 56 | Male | 5 | Social Work Expert |
| SP | 31 | Male | 6 | Social Work Practitioner |

| Themes | Subthemes | Codes |
| --- | --- | --- |
| Mental health literacy | Unfamiliarity with mental health | - *I don’t know about mental health word* - *Hear about the hospital but not gone to hospital* - *Read on WhatsApp quotes anger and frustration lead to mental health issues* |
| Perception about mental health | - *Have cognitive impairment* - *Have Behavioral Change* - *Mental state as a relief.* - *Mental health is in good state* - *Having family to talk and staying happy.* - *Changes according situations* - *Control over mind’s restlessness* - *Focusing on present moment.* |
| Barriers to access mental health care and services | Internal barriers | - *Preference for family* - *Approach on the behavioral changes* - *Misconception about treatment* |
| External barriers | - *Lack of trust on doctors* - *Stigma on being judged or labelled* - *Expensive* |
| Psychosocial Stressors with coping strategies | Psychosocial stressors | - *Family stressors* - *Financial stressors* - *Gender related responsibilities* - *Worried about physical health* |
| Coping strategies | - *Distraction techniques* - *Religious activities* |
| Recommendation to improve mental health care | Creating awareness | - *Via social media* - *Role play or street-play* - *Advertisements of toll-free number provided by the government* - *Mental health camps* - *Referral services* |
| Skill development | - *Beautician course* - *Tailoring courses* |
| Empowerment strategies | - *De-addiction center in community* - *Making Rigid laws for women safety* - *Recreational programmer* - *Self-defense* - *Providing houses to women* |
